# Supplementary material for: Hen Egg White Lysozyme (HEWL) Confers Resistance to Verticillium Wilt in Cotton by Inhibiting the Spread of Fungus and Generating ROS Burst
Source: MDPI journal article supplement (doi:10.3390/ijms242417164), 2023-12-05
Supplement: s1 [file s1]

# **Hen Egg White Lysozyme (HEWL) Confers Resistance to Verticillium Wilt in Cotton by Inhibiting the Spread of Fungus and Generating ROS Burst**

**Wenfang Guo \*, Gangqiang Li, Nan Wang, Caifeng Yang, Huakang Peng, Mengqi Wang and Dehu Liu \***

Biotechnology Research Institute, Chinese Academy of Agricultural Sciences, Beijing 100081, China;  
lgq-1969@163.com (G.L.); wangnan@caas.cn (N.W.); ycfcaas@163.com (C.Y.); canmiki@outlook.com (H.P.);  
13937133482@163.com (M.W.)

\* Correspondence: guowf87@163.com (W.G.); liudehu2006@126.com (D.L.)

*nptII*:

atgattgaacaagatggattgcacgcaggttctccggcgttgggtggagaggctattcggctatgactgggcacacagacaatcggtgctctgatg  
ccgccgtgttccggctgtcagcgcagggcgcccgggtcttttgtcaagaccgacctgtccggtgccctgaatgaactgcaggacgaggcagcgcggt  
atcgtggctggccacgcagggcggttcttgcgcagctgtgtcgcagcttgcactgaagcgggaaggactggctgtattgggcgaagtgcgggggc  
aggatctcctgtcatctcacctgtcctcgcgagaaagtatccatcatggctgatgcaatgcggcggtgcatacgttgatccggctacctgccattcga  
ccaccaagcgaaacatcgcatcgagcgcagcgtactcggatggaagcgggtcttgcgatcaggatgatctggacgaagagcatcaggggctcgcgc  
cagccgaactgttcgcaggctcaaggcgcgcgatgcccgcagggcgatgatctcgtcgtgacctatggcgatgcctgttgcgaatatcatggtggaaa  
tggccgcttttctggattcatcgactgtggccggtgggtgtggcggaccgctatcaggacatagcgttggctaccctgtatattgctgaagagcttggcg  
gcgaatgggtgacgccttctcgtgtttacggtatcgcgctcccgattcgcagcgcacgccttctatcgcttcttgacgagtcttctga

*CP4-EPSPS*:

atggcacaaattaacaacatggcacaaaggatacaaaccttaatcccaattccaatttcataaaccccaagttcctaatacttcaagtttctgttttggat  
ctaaaaaactgaaaaattcagcaaatctatgttggtttgaaaaaagattcaattttatgcaaaagtttcttcttaggatttcagcatcagtggtctacgc  
ctgcatgttccaggtgcaagcagccggcccgaaccgcccgaatccttggccttccggaaccgtccgcattcccgcgacaagtgcgtctccacc  
ggctcttcatgttgcgggtctcgcgagcgggtgaaacgcgcacacccgcttctggaaggcgcaggtcatcaatacgggcaaggccatgcaggcca  
tgggcgcaggtaccgtaagggaaggcgacacctggatcatcgatggcgtcggcaatggcggcctcctggcgcctgaggcgcgcgtcgatttcggcaat  
gcccgcacgggctgcgcctgacctgggctcgtcgggtctacgatttcgacagcaccttcatcgcgacgcctcgtcacaaagcggccgatggggc  
gcgtgtgaaccgctgcgcgaaatgggcgtgcaggtgaaatcggaagacgggtgacgttctccggtaccttgcggggccgaagacgcgcgacccg  
atcacctaccgctgcgcgttgctccgcacaggtgaagtcgcgcgtcgcgcggcctcaacacgcccggcatcacgacggtcatcgagccgatca  
tgacgtgcgatcatacgaaaaagatgctgcagggttggcgcaaccttacgtcgagacggatgcggacggcgtgcgcacctccgctggaaggc  
cgcggaagctcaccggcaagtcacgtgcggggcgaccgtctcgcagggcctcccgctggttgcggcctgcttgttcgggctccgacgtca  
ccatctcaacgtgctgatgaacccaccgcacggcctcatctgacgtgcaggaaatgggcgcgcgacatcgaagtcataacctgcgccttgcggg  
cgcggaagacgtggcgacgtgcgcgttgcctcctccagctgaagggcgctcacgggtgcggaagaccgcgcgcctccgatgatcgacgaatatccga  
ttctcgtgtcgcgcgccttgcggaaggggcgaccgtgatgaacggcttggaagaactccgcgtcaaggaaagcagccctcctcgccgtcgca  
atggcctcaagctaatggcgtggttgatgagggcgagacgtcgtcgtcgtcgttggccgctgacggcaaggggctcggaacgcctcgggc  
gcccgcgtcgccaccatctcgatcaccgcacgcctatgacttctcgtcatggcctcgttcggaaaacctgtcacggtggacgatgccacgatgat  
cgccacgagcttcccgagttcatggacctgatggccgggctgggcgcgaagatcgaactctccgatacgaaggctgcctga

*HEWL*:

Aaagtctttggacgatgtgagctggcagcggctatgaagcgtcacggacttgataactatcggggatacagcctgggaaactgggtgtgttgcaaaa  
ttcagagtaacttaacaccaggtacaaaaccgtaacaccgatgggagtagcactacggaatctacagatcaacagccgctggtgtgcaacgat  
ggcaggacccaggtccaggaacctgtgaacatcccgctcagcctgtcgtgagctcagacataacagcgagcgtgaactgcgcgaagaagatcgt  
cagcgtatggaaacggcatgagcgcgtgggtcgctggcgcaaccgtgcaagggtaccgacgtccaggcgtggatcagaggctgccggctgtga

**Figure S1.** The gene sequences of *nptII*, *CP4-EPSPS*, *HEWL* in the plant expression vector pBI121-35S::CP4-EPSPS-PetE::HEWL.

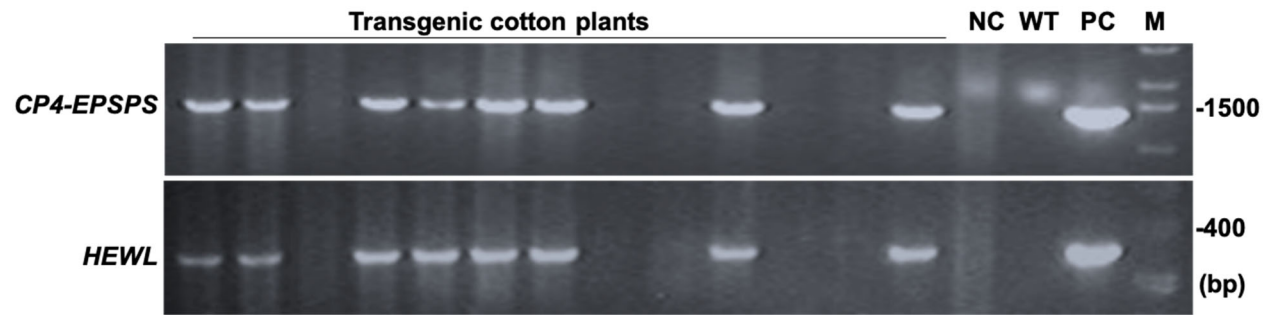

**Figure S2.** PCR analysis of T<sub>0</sub> transgenic cotton plants generation. NC: blank control; WT: wild type; PC: plasmid as positive control.

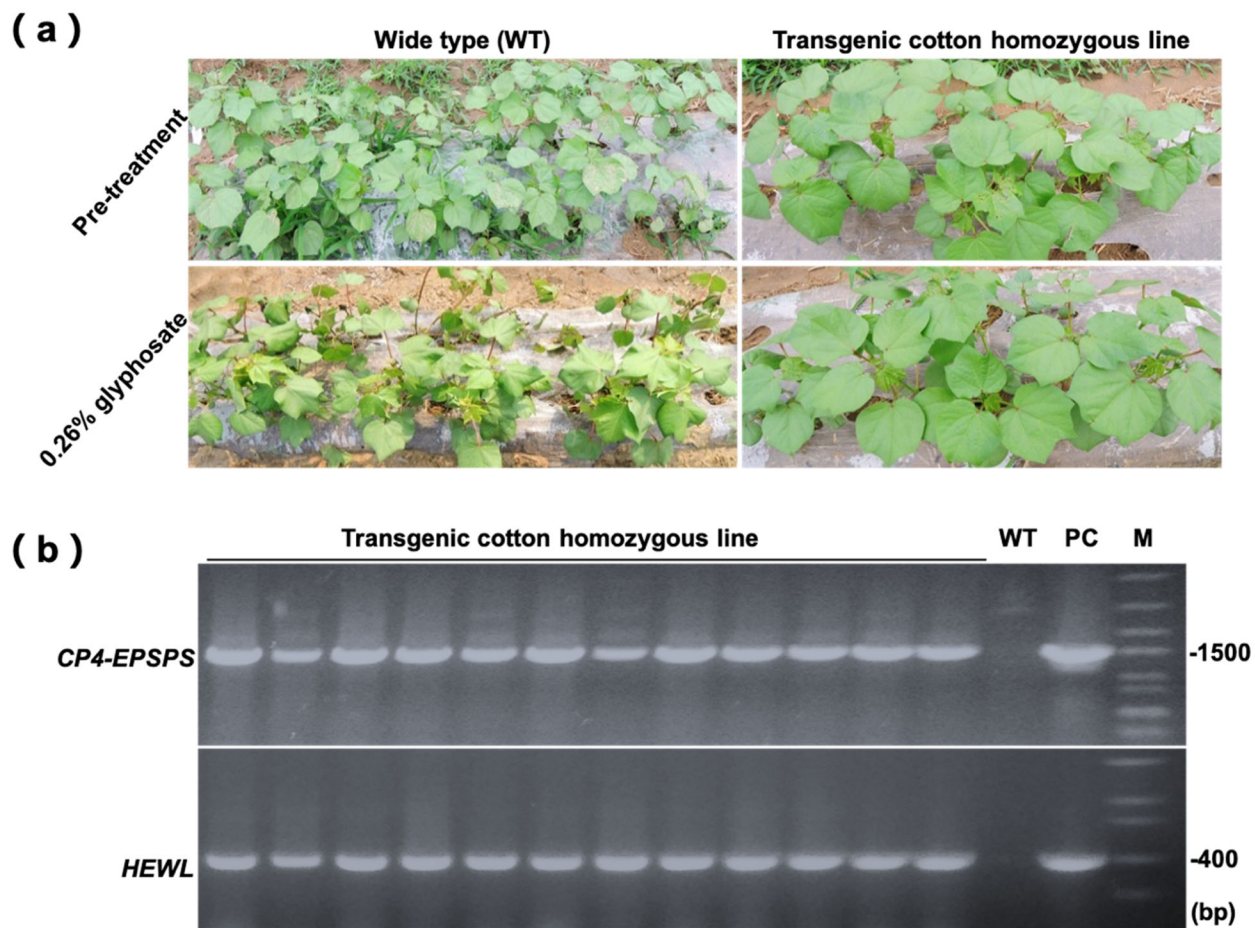

**Figure S3.** Identification of transgenic cotton homozygous line plants. (a) 0.26% glyphosate screening of transgenic cotton homozygous line. (b) PCR analysis of transgenic cotton homozygous line. WT: wild type; PC: plasmid as positive control.

**Table S1.** The primers used in this study.

| Primers      | Sequences (5'-3')                        | Purpose                      |
|--------------|------------------------------------------|------------------------------|
| CP4-F1       | AGGATCCAACAATGGCACAATTAACAACATGGCACAAG   | Vector construction          |
| CP4-R1       | ACTCGAGTTAGGCAGCCTTCGTATCGGAGAG          |                              |
| HEWL-F1      | CTCGAGATGAAAGTCTTTGGACGATGTGAGCTGG       | Vector construction          |
| HEWL-R1      | GCGGCCGCTCAGCCGGCAGCCTCTGATCCACGC        |                              |
| CP4-F2       | ATGGCACAATTAACAACATGGCACAAG              | Detection of target gene     |
| CP4-R2       | TTAGGCAGCCTTCGTATCGGAGAGTTCGATC          |                              |
| HEWL-F2      | AAAGTCTTTGGACGATGTGAGCTGGCAGCGGCTATGAAGC | Detection of target gene     |
| HEWL-R2      | GCCGTTTCCATCGCTGACGATCTTC                |                              |
| CP4-F3       | CTCGTCGGGGTCTACGATTTGACAGC               | Southern blot                |
| CP4-R3       | TCAGGCAGCCTTCGTATCGGAGAGTTC              |                              |
| GhActin-F    | ATCCTCCGTCTTGACCTTG                      | qPCR (cotton reference gene) |
| GhActin-R    | TGTCCGTCAGGCAACTCAT                      |                              |
| CP4-F        | GTCTACGATTTGACAGCACC                     | qPCR                         |
| CP4-R        | ACCGTCTTCCGATTTACACC                     |                              |
| HEWL-F       | CTATGAAGCGTCACGGACTTG                    | qPCR                         |
| HEWL-R       | CGGTGTTACGGTTTGTAGCCT                    |                              |
| Vd991-F      | AAAGTTTTAATGGTTCGCTAAGA                  | qPCR                         |
| Vd991-R      | CTTGGTCATTTAGAGGAAGTAA                   |                              |
| GhNPR1-F     | TCAGTTTAGACAAGCCCGAGAA                   | qPCR                         |
| GhNPR1-R     | CGTATGACCCTCTTTCAGTAGCA                  |                              |
| GhPR1-F      | TGCTGTAAATATGTGGGTTAATGAG                | qPCR                         |
| GhPR1-R      | GAAATTGCCTGGAGGAGAATAG                   |                              |
| GhNOA1-F     | GAGGATGCTGAAAGACCTGCTA                   | qPCR                         |
| GhNOA1-R     | TCTCAACTGGCTTGGGTACATG                   |                              |
| GhHSR203J -F | GTGATAGCTCAGGAGGGAACAT                   | qPCR                         |
| GhHSR203J -R | CTAACTCGGACTTGCTTCGTTG                   |                              |
| GhHIN1-F     | GCTGATGAGACATCGGAGTTTA                   | qPCR                         |
| GhHIN1-R     | CTACCATTCCCAGTGTTCAAAG                   |                              |
| GhPFN2-F     | ATGATGTCGTGGCAAGCTTACG                   | qPCR                         |
| GhPFN2-R     | TCAATAACCCTGATCGAGG                      |                              |
| GhPDF1.2-F   | CTGTGGTAGCGGATGGTGATAAG                  | qPCR                         |
| GhPDF1.2-R   | GTGCAGACGCATTTGCCAAGGAA                  |                              |
